# Supplementary material
Source: MDPI journal article supplement (https://www.mdpi.com/2076-3298/8/2/15)
Supplement: s1 [file s1]

Supplementary Materials

# Discontinuous Geochemical Monitoring of the Galleria Italia Circumneutral Waters (Former Hg-Mining Area of Abbadia San Salvatore, Tuscany, Central Italy) Feeding the Fosso Della Chiusa Creek

Orlando Vaselli <sup>1,2,\*</sup>, Marta Lazzaroni <sup>1,2</sup>, Barbara Nisi <sup>2</sup>, Jacopo Cabassi <sup>2</sup>, Franco Tassi <sup>1,2</sup>, Daniele Rappuoli <sup>3,4</sup> and Federica Meloni <sup>5</sup>

<sup>1</sup> Department of Earth Sciences, University of Florence, Via G. La Pira 4, 50121 Florence, Italy; marta.lazzaroni@unifi.it (M.L.), franco.tassi@unifi.it (F.T.)

<sup>2</sup> CNR-IGG Institute of Geosciences and Earth Resources, Via G. La Pira 4, 50121 Florence, Italy; barbara.nisi@igg.cnr.it (B.N.); jacopo.cabassi@igg.cnr.it (J.C.)

<sup>3</sup> Unione dei Comuni Amiata Val d'Orcia, Unità di Bonifica, Via Grossetana 209, Piancastagnaio, 53025 Siena, Italy; d.rappuoli@uc-amiatavaldorcia.si.it

<sup>4</sup> Parco Museo Minerario di Abbadia San Salvatore—Via Suor Gemma, Abbadia San Salvatore 1, 53021 Siena, Italy

<sup>5</sup> INSTM—National Interuniversity Consortium of Materials Science and Technology, Via Giusti 9, 50121 Florence, Italy; chiccafede95@gmail.com

\* Correspondence: orlando.vaselli@unifi.it

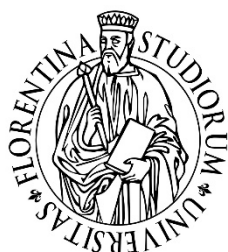

UNIVERSITÀ  
DEGLI STUDI  
FIRENZE

**DST**  
DIPARTIMENTO DI  
SCIENZE DELLA TERRA

**Table S1.** Description of QA/QC, the criterion of acceptability and the frequency adopted during the analysis of this work.

| QA/QC Protocol                                                                          | Acceptability Criterion                     | Measurement Frequency                                                                                                                                                                  |
|-----------------------------------------------------------------------------------------|---------------------------------------------|----------------------------------------------------------------------------------------------------------------------------------------------------------------------------------------|
| Instrument Detection Limits (IDLs)                                                      | < LLOQ (lower limit of quantitation)        | At least once when a new instrumentation is set up, after instrumental maintenance and/or according to the QC protocol                                                                 |
| Method blank                                                                            | < ½LLOQ                                     | For each batch of samples and when the reactants are changed                                                                                                                           |
| Linear range                                                                            | Within 10%                                  | For each analytical sequence                                                                                                                                                           |
| Matrix spike, Matrix spike                                                              | Within ± 25%. RPD precision < 20%           | For each analytical sequence and at least every 20 samples                                                                                                                             |
| Laboratory control sample (LCS)                                                         | Within 20%                                  | For each analytical sequence and at least every 20 samples                                                                                                                             |
| Lower limit of quantitation check sample (LLOQ)                                         | Within ± 35%. RSD precision < 20%           | Every 3 months                                                                                                                                                                         |
| Spectral interference check solution (SIC)                                              | Unspiked elements are to be < 2xLLOQ        | To be read at the beginning of each analytical batch and every 12 h when the instrument is used continuously                                                                           |
| Internal Standard                                                                       | <30%                                        |                                                                                                                                                                                        |
| Calibration blank (ICB/CCB)                                                             | ICB ≤ LLOQ<br>CCB < LLOQ                    | ICB = initial calibration blank to be analyzed after the calibration curve.<br>CCB = continuing calibration blank to be read every 10 samples and at the end of each batch of samples. |
| Initial calibration verification/Continuing calibration verification standard (ICV/CCV) | Within ± 10% with respect to the real value | Every 10 samples and at the end of each batch of samples.                                                                                                                              |
